# Supplementary material
Source: ML conference proceedings conference paper supplement (https://proceedings.neurips.cc/paper_files/paper/2021/hash/4afe044911ed2c247005912512ace23b-Abstract.html)
Supplement: Supplementary file 1 [file 4afe044911ed2c247005912512ace23b-Supplemental.zip]

Archive with 240 entries (234 files):
- supplement/
- __MACOSX/._supplement
- supplement/.DS_Store
- __MACOSX/supplement/._.DS_Store
- supplement/code/
- __MACOSX/supplement/._code
- supplement/paper+appendix.pdf
- __MACOSX/supplement/._paper+appendix.pdf
- supplement/code/run.py
- __MACOSX/supplement/code/._run.py
- supplement/code/vgg.py
- __MACOSX/supplement/code/._vgg.py
- supplement/code/.DS_Store
- __MACOSX/supplement/code/._.DS_Store
- supplement/code/model.py
- __MACOSX/supplement/code/._model.py
- supplement/code/dataset.py
- __MACOSX/supplement/code/._dataset.py
- supplement/code/oml/
- __MACOSX/supplement/code/._oml
- supplement/code/resnet.py
- __MACOSX/supplement/code/._resnet.py
- supplement/code/readme.txt
- __MACOSX/supplement/code/._readme.txt
- supplement/code/data/
- __MACOSX/supplement/code/._data
- supplement/code/query_strategies/
- __MACOSX/supplement/code/._query_strategies
- supplement/code/oml/data_155.pk
- __MACOSX/supplement/code/oml/._data_155.pk
- supplement/code/query_strategies/badge_sampling_mcmc.py
- __MACOSX/supplement/code/query_strategies/._badge_sampling_mcmc.py
- supplement/code/query_strategies/random_sampling.py
- __MACOSX/supplement/code/query_strategies/._random_sampling.py
- supplement/code/query_strategies/entropy_sampling_dropout.py
- __MACOSX/supplement/code/query_strategies/._entropy_sampling_dropout.py
- supplement/code/query_strategies/least_confidence.py
- __MACOSX/supplement/code/query_strategies/._least_confidence.py
- supplement/code/query_strategies/.badge_sampling_mcmc.py.swo
- __MACOSX/supplement/code/query_strategies/._.badge_sampling_mcmc.py.swo
- supplement/code/query_strategies/kmeans_sampling.py
- __MACOSX/supplement/code/query_strategies/._kmeans_sampling.py
- supplement/code/query_strategies/util.py
- __MACOSX/supplement/code/query_strategies/._util.py
- supplement/code/query_strategies/active_learning_by_learning.py
- __MACOSX/supplement/code/query_strategies/._active_learning_by_learning.py
- supplement/code/query_strategies/kcenter_greedy.py
- __MACOSX/supplement/code/query_strategies/._kcenter_greedy.py
- supplement/code/query_strategies/__init__.py
- __MACOSX/supplement/code/query_strategies/.___init__.py
- supplement/code/query_strategies/strategy.py
- __MACOSX/supplement/code/query_strategies/._strategy.py
- supplement/code/query_strategies/__pycache__/
- __MACOSX/supplement/code/query_strategies/.___pycache__
- supplement/code/query_strategies/margin_sampling.py
- __MACOSX/supplement/code/query_strategies/._margin_sampling.py
- supplement/code/query_strategies/badge_sampling_mcmc2.py
- __MACOSX/supplement/code/query_strategies/._badge_sampling_mcmc2.py
- supplement/code/query_strategies/bait_sampling.py
- __MACOSX/supplement/code/query_strategies/._bait_sampling.py
- supplement/code/query_strategies/margin_sampling_dropout.py
- __MACOSX/supplement/code/query_strategies/._margin_sampling_dropout.py
- supplement/code/query_strategies/batch_bald.py
- __MACOSX/supplement/code/query_strategies/._batch_bald.py
- supplement/code/query_strategies/.badge_sampling_ak3.py.swo
- __MACOSX/supplement/code/query_strategies/._.badge_sampling_ak3.py.swo
- supplement/code/query_strategies/adversarial_deepfool.py
- __MACOSX/supplement/code/query_strategies/._adversarial_deepfool.py
- supplement/code/query_strategies/.badge_sampling_mcmc.py.swp
- __MACOSX/supplement/code/query_strategies/._.badge_sampling_mcmc.py.swp
- supplement/code/query_strategies/entropy_sampling.py
- __MACOSX/supplement/code/query_strategies/._entropy_sampling.py
- supplement/code/query_strategies/badge_sampling.py
- __MACOSX/supplement/code/query_strategies/._badge_sampling.py
- supplement/code/query_strategies/core_set_solve.py
- __MACOSX/supplement/code/query_strategies/._core_set_solve.py
- supplement/code/query_strategies/core_set.py
- __MACOSX/supplement/code/query_strategies/._core_set.py
- supplement/code/query_strategies/baseline_sampling.py
- __MACOSX/supplement/code/query_strategies/._baseline_sampling.py
- supplement/code/query_strategies/cpu_dist.py
- __MACOSX/supplement/code/query_strategies/._cpu_dist.py
- supplement/code/query_strategies/bayesian_active_learning_disagreement_dropout.py
- __MACOSX/supplement/code/query_strategies/._bayesian_active_learning_disagreement_dropout.py
- supplement/code/query_strategies/adversarial_bim.py
- __MACOSX/supplement/code/query_strategies/._adversarial_bim.py
- supplement/code/query_strategies/least_confidence_dropout.py
- __MACOSX/supplement/code/query_strategies/._least_confidence_dropout.py
- supplement/code/query_strategies/__pycache__/bait_samplng.cpython-36.pyc
- __MACOSX/supplement/code/query_strategies/__pycache__/._bait_samplng.cpython-36.pyc
- supplement/code/query_strategies/__pycache__/__init__.cpython-38.pyc
- __MACOSX/supplement/code/query_strategies/__pycache__/.___init__.cpython-38.pyc
- supplement/code/query_strategies/__pycache__/bayesian_active_learning_disagreement_dropout.cpython-37.pyc
- __MACOSX/supplement/code/query_strategies/__pycache__/._bayesian_active_learning_disagreement_dropout.cpython-37.pyc
- supplement/code/query_strategies/__pycache__/badge_bonus.cpython-38.pyc
- __MACOSX/supplement/code/query_strategies/__pycache__/._badge_bonus.cpython-38.pyc
- supplement/code/query_strategies/__pycache__/random_sampling.cpython-37.pyc
- __MACOSX/supplement/code/query_strategies/__pycache__/._random_sampling.cpython-37.pyc
- supplement/code/query_strategies/__pycache__/margin_sampling.cpython-36.pyc
- __MACOSX/supplement/code/query_strategies/__pycache__/._margin_sampling.cpython-36.pyc
- supplement/code/query_strategies/__pycache__/baseline_sampling.cpython-38.pyc
- __MACOSX/supplement/code/query_strategies/__pycache__/._baseline_sampling.cpython-38.pyc
- supplement/code/query_strategies/__pycache__/margin_sampling.cpython-37.pyc
- __MACOSX/supplement/code/query_strategies/__pycache__/._margin_sampling.cpython-37.pyc
- supplement/code/query_strategies/__pycache__/random_sampling.cpython-36.pyc
- __MACOSX/supplement/code/query_strategies/__pycache__/._random_sampling.cpython-36.pyc
- supplement/code/query_strategies/__pycache__/bayesian_active_learning_disagreement_dropout.cpython-36.pyc
- __MACOSX/supplement/code/query_strategies/__pycache__/._bayesian_active_learning_disagreement_dropout.cpython-36.pyc
- supplement/code/query_strategies/__pycache__/entropy_sampling.cpython-38.pyc
- __MACOSX/supplement/code/query_strategies/__pycache__/._entropy_sampling.cpython-38.pyc
- supplement/code/query_strategies/__pycache__/badge_sampling.cpython-38.pyc
- __MACOSX/supplement/code/query_strategies/__pycache__/._badge_sampling.cpython-38.pyc
- supplement/code/query_strategies/__pycache__/least_confidence.cpython-36.pyc
- __MACOSX/supplement/code/query_strategies/__pycache__/._least_confidence.cpython-36.pyc
- supplement/code/query_strategies/__pycache__/margin_sampling_dropout.cpython-38.pyc
- __MACOSX/supplement/code/query_strategies/__pycache__/._margin_sampling_dropout.cpython-38.pyc
- supplement/code/query_strategies/__pycache__/adversarial_bim.cpython-37.pyc
- __MACOSX/supplement/code/query_strategies/__pycache__/._adversarial_bim.cpython-37.pyc
- supplement/code/query_strategies/__pycache__/badge_sampling_cov.cpython-36.pyc
- __MACOSX/supplement/code/query_strategies/__pycache__/._badge_sampling_cov.cpython-36.pyc
- supplement/code/query_strategies/__pycache__/core_set.cpython-37.pyc
- __MACOSX/supplement/code/query_strategies/__pycache__/._core_set.cpython-37.pyc
- supplement/code/query_strategies/__pycache__/core_set.cpython-36.pyc
- __MACOSX/supplement/code/query_strategies/__pycache__/._core_set.cpython-36.pyc
- supplement/code/query_strategies/__pycache__/badge_sampling_cov.cpython-37.pyc
- __MACOSX/supplement/code/query_strategies/__pycache__/._badge_sampling_cov.cpython-37.pyc
- supplement/code/query_strategies/__pycache__/adversarial_bim.cpython-36.pyc
- __MACOSX/supplement/code/query_strategies/__pycache__/._adversarial_bim.cpython-36.pyc
- supplement/code/query_strategies/__pycache__/least_confidence.cpython-37.pyc
- __MACOSX/supplement/code/query_strategies/__pycache__/._least_confidence.cpython-37.pyc
- supplement/code/query_strategies/__pycache__/adversarial_deepfool.cpython-38.pyc
- __MACOSX/supplement/code/query_strategies/__pycache__/._adversarial_deepfool.cpython-38.pyc
- supplement/code/query_strategies/__pycache__/badge_sampling_hes.cpython-38.pyc
- __MACOSX/supplement/code/query_strategies/__pycache__/._badge_sampling_hes.cpython-38.pyc
- supplement/code/query_strategies/__pycache__/kmeans_sampling.cpython-38.pyc
- __MACOSX/supplement/code/query_strategies/__pycache__/._kmeans_sampling.cpython-38.pyc
- supplement/code/query_strategies/__pycache__/kcenter_greedy.cpython-37.pyc
- __MACOSX/supplement/code/query_strategies/__pycache__/._kcenter_greedy.cpython-37.pyc
- supplement/code/query_strategies/__pycache__/badge_sampling_ak3.cpython-36.pyc
- __MACOSX/supplement/code/query_strategies/__pycache__/._badge_sampling_ak3.cpython-36.pyc
- supplement/code/query_strategies/__pycache__/cali_badge_sampling.cpython-36.pyc
- __MACOSX/supplement/code/query_strategies/__pycache__/._cali_badge_sampling.cpython-36.pyc
- supplement/code/query_strategies/__pycache__/strategy.cpython-37.pyc
- __MACOSX/supplement/code/query_strategies/__pycache__/._strategy.cpython-37.pyc
- supplement/code/query_strategies/__pycache__/strategy.cpython-36.pyc
- __MACOSX/supplement/code/query_strategies/__pycache__/._strategy.cpython-36.pyc
- supplement/code/query_strategies/__pycache__/cali_badge_sampling.cpython-37.pyc
- __MACOSX/supplement/code/query_strategies/__pycache__/._cali_badge_sampling.cpython-37.pyc
- supplement/code/query_strategies/__pycache__/badge_sampling_ak3.cpython-37.pyc
- __MACOSX/supplement/code/query_strategies/__pycache__/._badge_sampling_ak3.cpython-37.pyc
- supplement/code/query_strategies/__pycache__/cali_badge_sampling2.cpython-37.pyc
- __MACOSX/supplement/code/query_strategies/__pycache__/._cali_badge_sampling2.cpython-37.pyc
- supplement/code/query_strategies/__pycache__/kcenter_greedy.cpython-36.pyc
- __MACOSX/supplement/code/query_strategies/__pycache__/._kcenter_greedy.cpython-36.pyc
- supplement/code/query_strategies/__pycache__/badge_sampling_ak2.cpython-37.pyc
- __MACOSX/supplement/code/query_strategies/__pycache__/._badge_sampling_ak2.cpython-37.pyc
- supplement/code/query_strategies/__pycache__/active_learning_by_learning.cpython-38.pyc
- __MACOSX/supplement/code/query_strategies/__pycache__/._active_learning_by_learning.cpython-38.pyc
- supplement/code/query_strategies/__pycache__/least_confidence_dropout.cpython-37.pyc
- __MACOSX/supplement/code/query_strategies/__pycache__/._least_confidence_dropout.cpython-37.pyc
- supplement/code/query_strategies/__pycache__/badge_sampling_ak.cpython-37.pyc
- __MACOSX/supplement/code/query_strategies/__pycache__/._badge_sampling_ak.cpython-37.pyc
- supplement/code/query_strategies/__pycache__/entropy_sampling_dropout.cpython-36.pyc
- __MACOSX/supplement/code/query_strategies/__pycache__/._entropy_sampling_dropout.cpython-36.pyc
- supplement/code/query_strategies/__pycache__/entropy_sampling_dropout.cpython-37.pyc
- __MACOSX/supplement/code/query_strategies/__pycache__/._entropy_sampling_dropout.cpython-37.pyc
- supplement/code/query_strategies/__pycache__/least_confidence_dropout.cpython-36.pyc
- __MACOSX/supplement/code/query_strategies/__pycache__/._least_confidence_dropout.cpython-36.pyc
- supplement/code/query_strategies/__pycache__/active_learning_by_learning.cpython-37.pyc
- __MACOSX/supplement/code/query_strategies/__pycache__/._active_learning_by_learning.cpython-37.pyc
- supplement/code/query_strategies/__pycache__/least_confidence_dropout.cpython-38.pyc
- __MACOSX/supplement/code/query_strategies/__pycache__/._least_confidence_dropout.cpython-38.pyc
- supplement/code/query_strategies/__pycache__/entropy_sampling_dropout.cpython-38.pyc
- __MACOSX/supplement/code/query_strategies/__pycache__/._entropy_sampling_dropout.cpython-38.pyc
- supplement/code/query_strategies/__pycache__/active_learning_by_learning.cpython-36.pyc
- __MACOSX/supplement/code/query_strategies/__pycache__/._active_learning_by_learning.cpython-36.pyc
- supplement/code/query_strategies/__pycache__/adversarial_deepfool.cpython-37.pyc
- __MACOSX/supplement/code/query_strategies/__pycache__/._adversarial_deepfool.cpython-37.pyc
- supplement/code/query_strategies/__pycache__/badge_sampling_hes.cpython-37.pyc
- __MACOSX/supplement/code/query_strategies/__pycache__/._badge_sampling_hes.cpython-37.pyc
- supplement/code/query_strategies/__pycache__/badge_sampling_hes.cpython-36.pyc
- __MACOSX/supplement/code/query_strategies/__pycache__/._badge_sampling_hes.cpython-36.pyc
- supplement/code/query_strategies/__pycache__/adversarial_deepfool.cpython-36.pyc
- __MACOSX/supplement/code/query_strategies/__pycache__/._adversarial_deepfool.cpython-36.pyc
- supplement/code/query_strategies/__pycache__/kmeans_sampling.cpython-37.pyc
- __MACOSX/supplement/code/query_strategies/__pycache__/._kmeans_sampling.cpython-37.pyc
- supplement/code/query_strategies/__pycache__/batch_bald.cpython-38.pyc
- __MACOSX/supplement/code/query_strategies/__pycache__/._batch_bald.cpython-38.pyc
- supplement/code/query_strategies/__pycache__/kcenter_greedy.cpython-38.pyc
- __MACOSX/supplement/code/query_strategies/__pycache__/._kcenter_greedy.cpython-38.pyc
- supplement/code/query_strategies/__pycache__/strategy.cpython-38.pyc
- __MACOSX/supplement/code/query_strategies/__pycache__/._strategy.cpython-38.pyc
- supplement/code/query_strategies/__pycache__/cali_badge_sampling.cpython-38.pyc
- __MACOSX/supplement/code/query_strategies/__pycache__/._cali_badge_sampling.cpython-38.pyc
- supplement/code/query_strategies/__pycache__/badge_sampling_ak3.cpython-38.pyc
- __MACOSX/supplement/code/query_strategies/__pycache__/._badge_sampling_ak3.cpython-38.pyc
- supplement/code/query_strategies/__pycache__/kmeans_sampling.cpython-36.pyc
- __MACOSX/supplement/code/query_strategies/__pycache__/._kmeans_sampling.cpython-36.pyc
- supplement/code/query_strategies/__pycache__/bait_sampling.cpython-36.pyc
- __MACOSX/supplement/code/query_strategies/__pycache__/._bait_sampling.cpython-36.pyc
- supplement/code/query_strategies/__pycache__/badge_sampling.cpython-37.pyc
- __MACOSX/supplement/code/query_strategies/__pycache__/._badge_sampling.cpython-37.pyc
- supplement/code/query_strategies/__pycache__/badge_sampling.cpython-36.pyc
- __MACOSX/supplement/code/query_strategies/__pycache__/._badge_sampling.cpython-36.pyc
- supplement/code/query_strategies/__pycache__/margin_sampling_dropout.cpython-37.pyc
- __MACOSX/supplement/code/query_strategies/__pycache__/._margin_sampling_dropout.cpython-37.pyc
- supplement/code/query_strategies/__pycache__/adversarial_bim.cpython-38.pyc
- __MACOSX/supplement/code/query_strategies/__pycache__/._adversarial_bim.cpython-38.pyc
- supplement/code/query_strategies/__pycache__/core_set.cpython-38.pyc
- __MACOSX/supplement/code/query_strategies/__pycache__/._core_set.cpython-38.pyc
- supplement/code/query_strategies/__pycache__/badge_sampling_cov.cpython-38.pyc
- __MACOSX/supplement/code/query_strategies/__pycache__/._badge_sampling_cov.cpython-38.pyc
- supplement/code/query_strategies/__pycache__/margin_sampling_dropout.cpython-36.pyc
- __MACOSX/supplement/code/query_strategies/__pycache__/._margin_sampling_dropout.cpython-36.pyc
- supplement/code/query_strategies/__pycache__/least_confidence.cpython-38.pyc
- __MACOSX/supplement/code/query_strategies/__pycache__/._least_confidence.cpython-38.pyc
- supplement/code/query_strategies/__pycache__/__init__.cpython-36.pyc
- __MACOSX/supplement/code/query_strategies/__pycache__/.___init__.cpython-36.pyc
- supplement/code/query_strategies/__pycache__/__init__.cpython-37.pyc
- __MACOSX/supplement/code/query_strategies/__pycache__/.___init__.cpython-37.pyc
- supplement/code/query_strategies/__pycache__/entropy_sampling.cpython-36.pyc
- __MACOSX/supplement/code/query_strategies/__pycache__/._entropy_sampling.cpython-36.pyc
- supplement/code/query_strategies/__pycache__/bayesian_active_learning_disagreement_dropout.cpython-38.pyc
- __MACOSX/supplement/code/query_strategies/__pycache__/._bayesian_active_learning_disagreement_dropout.cpython-38.pyc
- supplement/code/query_strategies/__pycache__/random_sampling.cpython-38.pyc
- __MACOSX/supplement/code/query_strategies/__pycache__/._random_sampling.cpython-38.pyc
- supplement/code/query_strategies/__pycache__/badge_sampling_mcmc2.cpython-37.pyc
- __MACOSX/supplement/code/query_strategies/__pycache__/._badge_sampling_mcmc2.cpython-37.pyc
- supplement/code/query_strategies/__pycache__/baseline_sampling.cpython-37.pyc
- __MACOSX/supplement/code/query_strategies/__pycache__/._baseline_sampling.cpython-37.pyc
- supplement/code/query_strategies/__pycache__/badge_sampling_mcmc.cpython-37.pyc
- __MACOSX/supplement/code/query_strategies/__pycache__/._badge_sampling_mcmc.cpython-37.pyc
- supplement/code/query_strategies/__pycache__/baseline_sampling.cpython-36.pyc
- __MACOSX/supplement/code/query_strategies/__pycache__/._baseline_sampling.cpython-36.pyc
- supplement/code/query_strategies/__pycache__/margin_sampling.cpython-38.pyc
- __MACOSX/supplement/code/query_strategies/__pycache__/._margin_sampling.cpython-38.pyc
- supplement/code/query_strategies/__pycache__/badge_bonus.cpython-36.pyc
- __MACOSX/supplement/code/query_strategies/__pycache__/._badge_bonus.cpython-36.pyc
- supplement/code/query_strategies/__pycache__/entropy_sampling.cpython-37.pyc
- __MACOSX/supplement/code/query_strategies/__pycache__/._entropy_sampling.cpython-37.pyc
