# Supplementary material
Source: ML conference proceedings conference paper supplement (https://proceedings.neurips.cc/paper_files/paper/2021/hash/4afe044911ed2c247005912512ace23b-Abstract.html)
Supplement: Supplementary file 1 [file 4afe044911ed2c247005912512ace23b-Supplemental.zip › supplement/code/dataset.py]

import numpy as np
import pdb
import torch
from torchvision import datasets
from torch.utils.data import Dataset
from PIL import Image
from torchvision import transforms

def get_dataset(name, path):
    if name == 'MNIST':
        return get_MNIST(path)
    elif name == 'FashionMNIST':
        return get_FashionMNIST(path)
    elif name == 'SVHN':
        return get_SVHN(path)
    elif name == 'CIFAR10':
        return get_CIFAR10(path)


def addNoise(labels, noiseLabels=[1,2], noiseCeil=0.5):
    labels = labels.numpy()
    nLabs = np.max(labels) + 1
    count = 0
    for y in labels:
        if y in noiseLabels and np.random.rand() < noiseCeil:
            newLabel = np.random.randint(nLabs)
            while newLabel == y: newLabel = np.random.randint(nLabs)
            labels[count] = newLabel
        count += 1
    return torch.Tensor(labels)

def get_MNIST(path):
    raw_tr = datasets.MNIST(path + '/MNIST', train=True, download=True)
    raw_te = datasets.MNIST(path + '/MNIST', train=False, download=True)
    X_tr = raw_tr.data
    Y_tr = raw_tr.targets
    X_te = raw_te.data
    Y_te = raw_te.targets
    return X_tr, Y_tr, X_te, Y_te

def get_FashionMNIST(path):
    raw_tr = datasets.FashionMNIST(path + '/FashionMNIST', train=True, download=True)
    raw_te = datasets.FashionMNIST(path + '/FashionMNIST', train=False, download=True)
    X_tr = raw_tr.train_data
    Y_tr = raw_tr.train_labels
    X_te = raw_te.test_data
    Y_te = raw_te.test_labels
    return X_tr, Y_tr, X_te, Y_te

def get_SVHN(path):
    data_tr = datasets.SVHN(path + '/SVHN', split='train', download=True)
    data_te = datasets.SVHN(path +'/SVHN', split='test', download=True)
    X_tr = data_tr.data
    Y_tr = torch.from_numpy(data_tr.labels)
    X_te = data_te.data
    Y_te = torch.from_numpy(data_te.labels)
    return X_tr, Y_tr, X_te, Y_te

def get_CIFAR10(path):
    data_tr = datasets.CIFAR10(path + '/CIFAR10', train=True, download=True)
    data_te = datasets.CIFAR10(path + '/CIFAR10', train=False, download=True)
    X_tr = data_tr.data
    Y_tr = torch.from_numpy(np.array(data_tr.targets))
    X_te = data_te.data
    Y_te = torch.from_numpy(np.array(data_te.targets))
    return X_tr, Y_tr, X_te, Y_te
    return X_tr, Y_tr, X_te, Y_te

def get_handler(name):
    if name == 'MNIST':
        return DataHandler3
    elif name == 'FashionMNIST':
        return DataHandler3
    elif name == 'SVHN':
        return DataHandler2
    elif name == 'CIFAR10':
        return DataHandler3
    else:
        return DataHandler4

class DataHandler1(Dataset):
    def __init__(self, X, Y, transform=None):
        self.X = X
        self.Y = Y
        self.transform = transform

    def __getitem__(self, index):
        x, y = self.X[index], self.Y[index]
        if self.transform is not None:
            x = Image.fromarray(x.numpy(), mode='L')
            x = self.transform(x)
        return x, y, index

    def __len__(self):
        return len(self.X)

class DataHandler2(Dataset):
    def __init__(self, X, Y, transform=None):
        self.X = X
        self.Y = Y
        self.transform = transform

    def __getitem__(self, index):
        x, y = self.X[index], self.Y[index]
        if self.transform is not None:
            x = Image.fromarray(np.transpose(x, (1, 2, 0)))
            x = self.transform(x)
        return x, y, index

    def __len__(self):
        return len(self.X)

class DataHandler3(Dataset):
    def __init__(self, X, Y, transform=None):
        self.X = X
        self.Y = Y
        self.transform = transform

    def __getitem__(self, index):
        x, y = self.X[index], self.Y[index]
        if self.transform is not None:
            x = Image.fromarray(x)
            x = self.transform(x)
        return x, y, index

    def __len__(self):
        return len(self.X)

class DataHandler4(Dataset):
    def __init__(self, X, Y, transform=None):
        self.X = X
        self.Y = Y
        self.transform = transform

    def __getitem__(self, index):
        x, y = self.X[index], self.Y[index]
        return x, y, index

    def __len__(self):
        return len(self.X)
