# Supplementary material
Source: ML conference proceedings conference paper supplement (https://proceedings.neurips.cc/paper_files/paper/2021/hash/4afe044911ed2c247005912512ace23b-Abstract.html)
Supplement: Supplementary file 1 [file 4afe044911ed2c247005912512ace23b-Supplemental.zip › supplement/code/query_strategies/__init__.py]

from .random_sampling import RandomSampling
from .least_confidence import LeastConfidence
from .margin_sampling import MarginSampling
from .entropy_sampling import EntropySampling
from .least_confidence_dropout import LeastConfidenceDropout
from .margin_sampling_dropout import MarginSamplingDropout
from .entropy_sampling_dropout import EntropySamplingDropout
from .kmeans_sampling import KMeansSampling
from .kcenter_greedy import KCenterGreedy
from .bayesian_active_learning_disagreement_dropout import BALDDropout
from .core_set import CoreSet
from .adversarial_bim import AdversarialBIM
from .adversarial_deepfool import AdversarialDeepFool
from .active_learning_by_learning import ActiveLearningByLearning
from .badge_sampling  import BadgeSampling
from .baseline_sampling  import BaselineSampling
from .bait_sampling  import BaitSampling
