# Supplementary material
Source: ML conference proceedings conference paper supplement (https://proceedings.neurips.cc/paper_files/paper/2021/hash/4afe044911ed2c247005912512ace23b-Abstract.html)
Supplement: Supplementary file 1 [file 4afe044911ed2c247005912512ace23b-Supplemental.zip › supplement/code/query_strategies/adversarial_deepfool.py]

import numpy as np
import torch
import torch.nn.functional as F
from .strategy import Strategy
from torch.autograd import Variable
import pdb
class AdversarialDeepFool(Strategy):
    def __init__(self, X, Y, idxs_lb, net, handler, args, max_iter=50):
        super(AdversarialDeepFool, self).__init__(X, Y, idxs_lb, net, handler, args)
        self.max_iter = max_iter

    def cal_dis(self, x):
        nx = Variable(torch.unsqueeze(x, 0), requires_grad=True)
        eta = Variable(torch.zeros(nx.shape))

        out, e1 = self.clf(nx + eta)
        n_class = out.shape[1]
        py = int(out.max(1)[1])
        ny = int(out.max(1)[1])

        i_iter = 0

        while py == ny and i_iter < self.max_iter:
            out[0, py].backward(retain_graph=True)
            grad_np = nx.grad.data.clone()
            value_l = np.inf
            ri = None

            for i in range(n_class):
                if i == py:
                    continue

                nx.grad.data.zero_()
                out[0, i].backward(retain_graph=True)
                grad_i = nx.grad.data.clone()

                wi = grad_i - grad_np
                fi = out[0, i] - out[0, py]
                value_i = np.abs(float(fi)) / np.linalg.norm(wi.numpy().flatten())

                if value_i < value_l:
                    ri = value_i/np.linalg.norm(wi.numpy().flatten()) * wi

            eta += Variable(ri.clone())
            nx.grad.data.zero_()
            out, e1 = self.clf(nx + eta)
            py = int(out.max(1)[1])
            i_iter += 1

        return (eta*eta).sum()

    def query(self, n):
        idxs_unlabeled = np.arange(self.n_pool)[~self.idxs_lb]

        self.clf.cpu()
        self.clf.eval()
        dis = np.zeros(idxs_unlabeled.shape)

        data_pool = self.handler(self.X[idxs_unlabeled], self.Y.numpy()[idxs_unlabeled], transform=self.args['transform'])
        for i in range(len(idxs_unlabeled)):
            if i % 100 == 0:
                print('adv {}/{}'.format(i, len(idxs_unlabeled)), flush=True)
            x, y, idx = data_pool[i]
            dis[i] = self.cal_dis(x)

        self.clf.cuda()

        return idxs_unlabeled[dis.argsort()[:n]]
