# Supplementary material
Source: ML conference proceedings conference paper supplement (https://proceedings.neurips.cc/paper_files/paper/2021/hash/4afe044911ed2c247005912512ace23b-Abstract.html)
Supplement: Supplementary file 1 [file 4afe044911ed2c247005912512ace23b-Supplemental.zip › supplement/code/query_strategies/entropy_sampling_dropout.py]

import numpy as np
import torch
from .strategy import Strategy

class EntropySamplingDropout(Strategy):
	def __init__(self, X, Y, idxs_lb, net, handler, args, n_drop=10):
		super(EntropySamplingDropout, self).__init__(X, Y, idxs_lb, net, handler, args)
		self.n_drop = n_drop

	def query(self, n):
		idxs_unlabeled = np.arange(self.n_pool)[~self.idxs_lb]
		probs = self.predict_prob_dropout(self.X[idxs_unlabeled], self.Y[idxs_unlabeled], self.n_drop)
		log_probs = torch.log(probs)
		U = (probs*log_probs).sum(1)
		return idxs_unlabeled[U.sort()[1][:n]]
