# Supplementary material
Source: ML conference proceedings conference paper supplement (https://proceedings.neurips.cc/paper_files/paper/2021/hash/4afe044911ed2c247005912512ace23b-Abstract.html)
Supplement: Supplementary file 1 [file 4afe044911ed2c247005912512ace23b-Supplemental.zip › supplement/code/query_strategies/margin_sampling.py]

import numpy as np
from .strategy import Strategy
import pdb

class MarginSampling(Strategy):
    def __init__(self, X, Y, idxs_lb, net, handler, args):
        super(MarginSampling, self).__init__(X, Y, idxs_lb, net, handler, args)

    def query(self, n):
        idxs_unlabeled = np.arange(self.n_pool)[~self.idxs_lb]
        probs = self.predict_prob(self.X[idxs_unlabeled], self.Y.numpy()[idxs_unlabeled])
        probs_sorted, idxs = probs.sort(descending=True)
        U = probs_sorted[:, 0] - probs_sorted[:,1]
        return idxs_unlabeled[U.sort()[1].numpy()[:n]]
