# Supplementary material
Source: ML conference proceedings conference paper supplement (https://proceedings.neurips.cc/paper_files/paper/2021/hash/4afe044911ed2c247005912512ace23b-Abstract.html)
Supplement: Supplementary file 1 [file 4afe044911ed2c247005912512ace23b-Supplemental.zip › supplement/code/vgg.py]

'''VGG11/13/16/19 in Pytorch.'''
import torch
import torch.nn as nn

cfg = {
    'VGG11': [64, 'M', 128, 'M', 256, 256, 'M', 512, 512, 'M', 512, 128, 'M'],
    'VGG13': [64, 64, 'M', 128, 128, 'M', 256, 256, 'M', 512, 512, 'M', 512, 128, 'M'],
    'VGG16': [64, 64, 'M', 128, 128, 'M', 256, 256, 256, 'M', 512, 512, 512, 'M', 512, 512, 128, 'M'],
    'VGG19': [64, 64, 'M', 128, 128, 'M', 256, 256, 256, 256, 'M', 512, 512, 512, 512, 'M', 512, 512, 512, 128, 'M'],
}


class VGG(nn.Module):
    def __init__(self, vgg_name, dropout=False):
        super(VGG, self).__init__()
        self.features = self._make_layers(cfg[vgg_name])
        self.linear = nn.Linear(128, 10)
        self.useDropout = dropout
        self.dropout = nn.Dropout(0.2)

    def forward(self, x):
        out = self.features(x)
        emb = out.view(out.size(0), -1)
        if self.useDropout == True: emb = self.dropout(emb) 
        out = self.linear(emb)
        return out, emb

    def _make_layers(self, cfg):
        layers = []
        in_channels = 3
        for x in cfg:
            if x == 'M':
                layers += [nn.MaxPool2d(kernel_size=2, stride=2)]
            else:
                layers += [nn.Conv2d(in_channels, x, kernel_size=3, padding=1),
                           nn.BatchNorm2d(x),
                           nn.ReLU(inplace=True)]
                in_channels = x
        layers += [nn.AvgPool2d(kernel_size=1, stride=1)]
        return nn.Sequential(*layers)

    def get_embedding_dim(self):
        return 128

def test():
    net = VGG('VGG11')
    x = torch.randn(2,3,32,32)
    y = net(x)
    print(y.size())
